# Supplementary material for: CD226 opposes TIGIT to disrupt Tregs in melanoma
Source: JCI journal article supplement (doi:10.1172/jci.insight.121157), 2018-07-25
Supplement: sd1 [file 1]

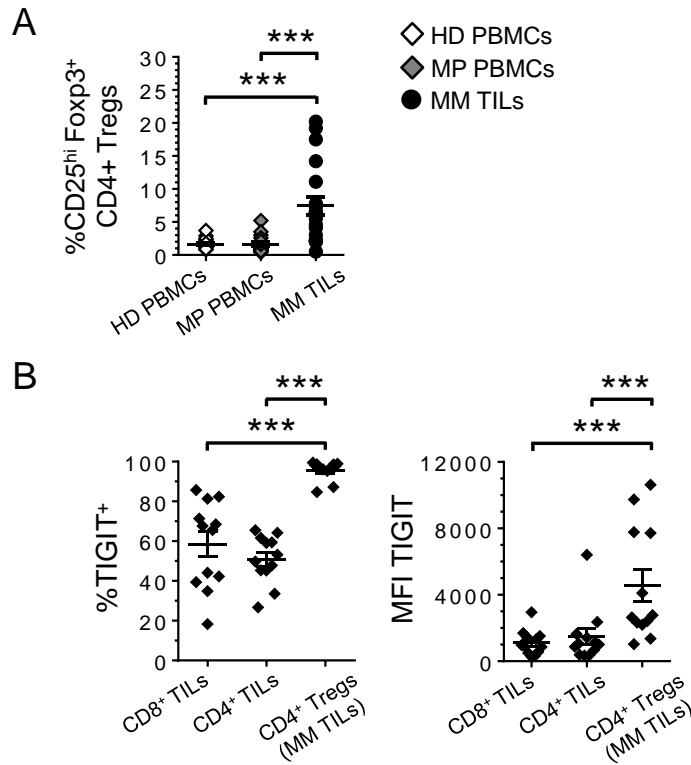

**Supplemental Figure 1. Treg frequencies and TIGIT expression in T cell subsets in healthy donors and melanoma patients.** (A) Summary data from all donors showing ex vivo frequencies of CD25<sup>hi</sup> Foxp3<sup>+</sup> CD4<sup>+</sup> Tregs within total CD4<sup>+</sup> T cells in PBMCs of healthy donors (HDs) and melanoma patients (MPs) and in metastatic melanoma (MM) tumor-infiltrating lymphocytes (TILs). *n* = 20. (B) Summary data showing ex vivo percentages and mean fluorescence (MFI) of TIGIT expression by total CD8<sup>+</sup> T cells, total CD4<sup>+</sup> T cells and CD25<sup>hi</sup> Foxp3<sup>+</sup> CD4<sup>+</sup> Tregs in MM TILs (*n* = 12) Horizontal bars depict the mean percentages. Error bars indicate s.e.m. P values were obtained by unpaired t-test. \*P < 0.05; \*\*P < 0.01; \*\*\*P < 0.001.

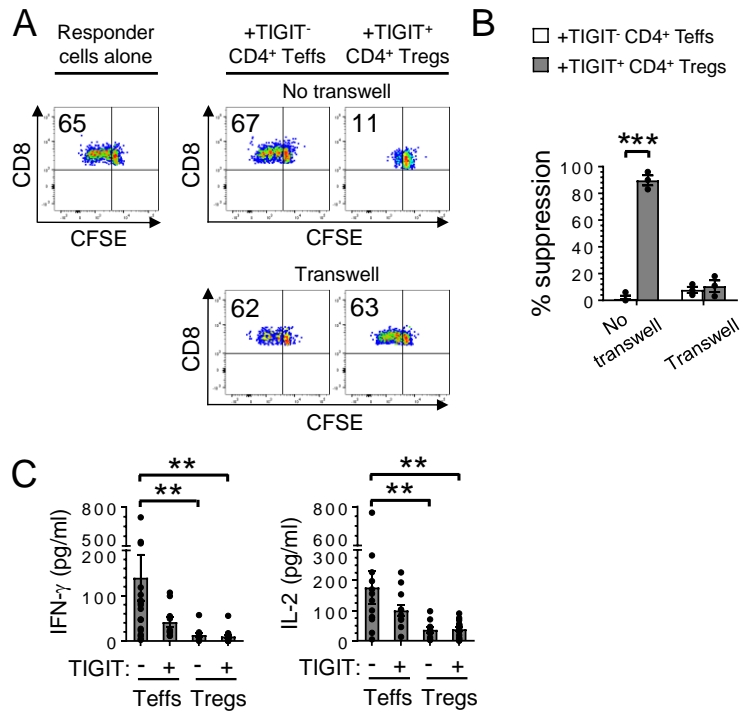

**Supplemental Figure 2. TIGIT<sup>+</sup> Treg suppression in transwell experiments and pro-inflammatory cytokine production by Tregs.** (A and B) Flow cytometric analysis from one representative experiment (A) and summary data (B) showing the suppression of proliferation of responder CD8<sup>+</sup> T cells that were stimulated for 6 days with autologous antigen presenting cells (APCs) and anti-CD3 mAbs in the presence of TIGIT<sup>-</sup> CD4<sup>+</sup> Teffs or TIGIT<sup>+</sup> CD4<sup>+</sup> Tregs. TIGIT<sup>-</sup> CD25<sup>-</sup> CD127<sup>-/+</sup> CD4<sup>+</sup> Teffs or TIGIT<sup>+</sup> CD25<sup>hi</sup> CD127<sup>-</sup> CD4<sup>+</sup> Tregs isolated from PBMCs of melanoma patients (MPs) were cultured either in direct contact with responder T cells in the bottom chamber of a transwell plate (*No transwell*) or in the top chamber of a transwell plate (*Transwell*) with allogeneic APCs and anti-CD3 mAbs ( $n = 3$ ). P values were obtained by paired t-test. (C) Pooled data showing the production of IFN- $\gamma$  and IL-2 by TIGIT<sup>-</sup> and TIGIT<sup>+</sup> CD25<sup>-</sup> CD127<sup>-/+</sup> CD4<sup>+</sup> Teffs and CD25<sup>hi</sup> CD127<sup>-</sup> CD4<sup>+</sup> Tregs isolated from PBMCs of MPs after a 6-day in vitro stimulation with aCD3/CD28 beads ( $n = 20$ ). Results represent the mean of independent experiments. Error bars indicate s.e.m. P values were obtained by unpaired t-test. \*\*P < 0.01; \*\*\*P < 0.001.

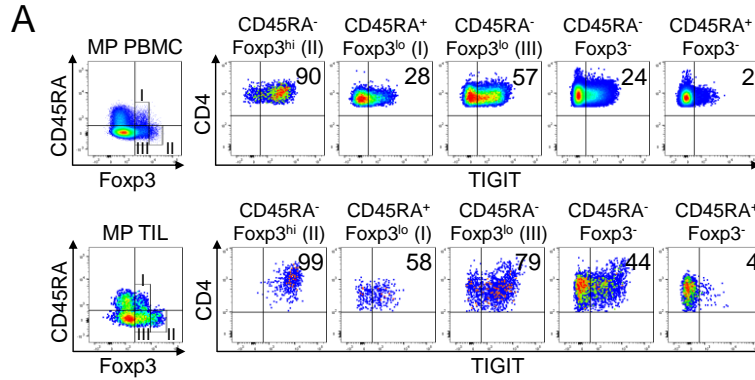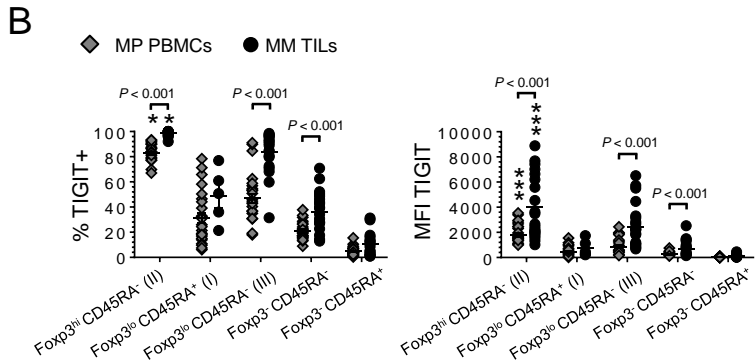

**Supplemental Figure 3. TIGIT expression in Foxp3<sup>+</sup> and Foxp3<sup>-</sup> CD4<sup>+</sup> T cell subsets in melanoma patients. (A and B)** Flow cytometry dot plots from 2 different melanoma patients (MPs) (A) and summary data from all MPs (B) showing ex vivo TIGIT expression [% and mean fluorescence intensity (MFI)] by Foxp3<sup>hi</sup> CD45RA<sup>-</sup> activated CD4<sup>+</sup> Tregs (Fr. II), Foxp3<sup>lo</sup> CD45RA<sup>+</sup> resting CD4<sup>+</sup> Tregs (Fr. I) and non-suppressive Foxp3<sup>lo</sup> CD45RA<sup>-</sup> CD4<sup>+</sup> T cells (Fr. III), as well as Foxp3<sup>-</sup> CD45RA<sup>-</sup> and Foxp3<sup>-</sup> CD45RA<sup>+</sup> CD4<sup>+</sup> T cells in PBMCs and tumor-infiltrating lymphocytes (TILs) of MPs ( $n = 20$ ). Horizontal bars depict the mean percentage or MFI. Error bars indicate s.e.m. P values were obtained by unpaired t-test and repeated-measures ANOVA followed by Tukey's test. \* $P < 0.05$ ; \*\* $P < 0.01$ ; \*\*\* $P < 0.001$ .

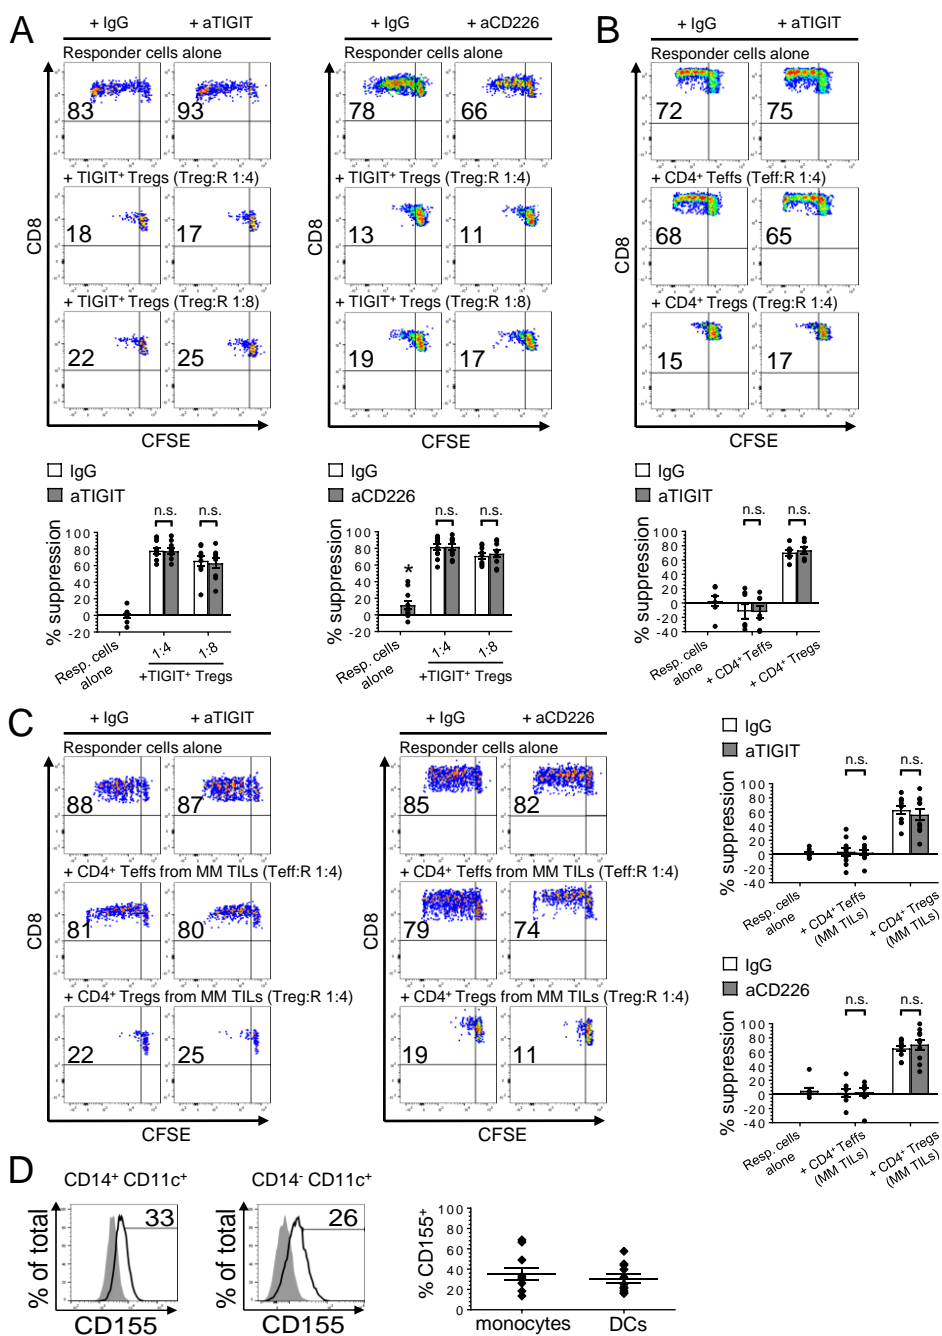

**Supplemental Figure 4. Treg suppression upon TIGIT or CD226 blockade in melanoma patients. (A)** Flow cytometric analysis from representative experiments and summary data showing the suppression of responder CD8<sup>+</sup> T cell proliferation after a 6-day in vitro stimulation (IVS) with autologous antigen presenting cells and anti-CD3 mAbs in the absence or presence of TIGIT<sup>+</sup> CD25<sup>hi</sup> CD127<sup>-</sup> CD4<sup>+</sup> Tregs isolated from PBMCs of melanoma patients (MPs) and with blocking aTIGIT or aCD226 mAbs or IgG control mAbs ( $n = 10$ ). **(B)** Flow cytometric analysis from one representative experiment and summary data showing the suppression of responder CD8<sup>+</sup> T cell proliferation after a 6-day IVS as in A but in the absence or presence of total CD25<sup>-</sup> CD127<sup>+/+</sup> CD4<sup>+</sup> Tefs or CD25<sup>hi</sup> CD127<sup>-</sup> CD4<sup>+</sup> Tregs isolated from PBMCs of MPs and with blocking aTIGIT mAbs or IgG control mAbs ( $n = 7$ ). **(C)** Flow cytometric analysis from one representative experiment and summary data showing the suppression of responder CD8<sup>+</sup> T cell proliferation after a 6-day IVS as in A but in the absence or presence of CD25<sup>-</sup> CD127<sup>+/+</sup> CD4<sup>+</sup> Tefs or CD25<sup>hi</sup> CD127<sup>-</sup> CD4<sup>+</sup> Tregs isolated from metastatic melanoma (MM) tumor-infiltrating lymphocytes (TILs) and with blocking aTIGIT or aCD226 mAbs or IgG control mAbs ( $n = 10$ ). The ratios of CD4<sup>+</sup> T cells to responder CD8<sup>+</sup> T cells are indicated. **(D)** Representative histograms and summary data showing PVR/CD155 expression on CD14<sup>+</sup> CD11c<sup>+</sup> monocytes and CD14<sup>-</sup> CD11c<sup>+</sup> DCs in non-CD3 cells from some samples used in stimulations of A, B and C ( $n = 10$ ). Solid grey histogram indicates isotype staining. Results represent the mean of independent experiments. Error bars indicate s.e.m. P values were obtained by paired t-test. *n.s.*, non significant.

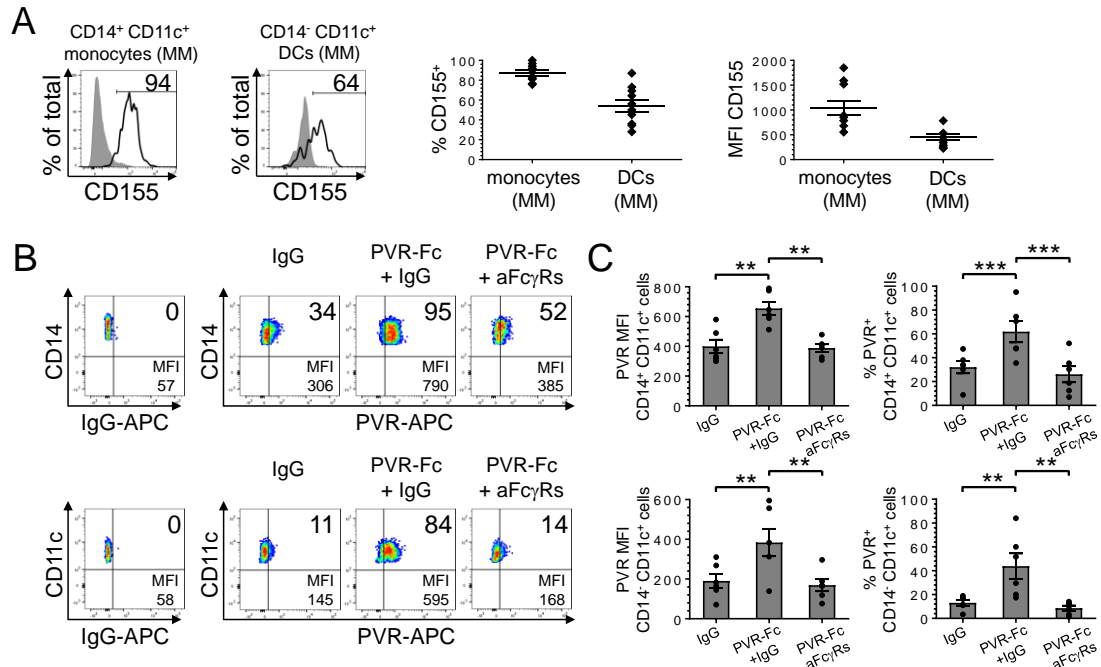

**Supplemental Figure 5. PVR expression by circulating antigen presenting cells (APCs) upon treatment with human PVR-Fc and by APCs in the tumor microenvironment.** (A) Representative histograms and summary data showing ex vivo PVR/CD155 expression on CD14<sup>+</sup> CD11c<sup>+</sup> monocytes and CD14<sup>-</sup> CD11c<sup>+</sup> DCs in metastatic melanoma (MM). *n* = 10. Solid grey histogram indicates isotype staining. (B-C) Flow cytometric analysis from one representative experiment (B) and summary data showing PVR expression [% and mean fluorescence intensity (MFI)] (C) on CD14<sup>+</sup> CD11c<sup>+</sup> monocytes and CD14<sup>-</sup> CD11c<sup>+</sup> DCs in PBMCs of donors after 2 hours of incubation in the presence of soluble PVR-Fc with or without blocking antibodies against Fcγ receptors CD16, CD32 and CD64 (aFcγRs) and/or IgG control mAbs. At the end of incubation, cells were stained with APC-labeled anti-PVR mAbs or APC-labeled IgG isotype control mAbs. *n* = 6. Results represent the mean of independent experiments. Error bars indicate s.e.m. P values were obtained by repeated-measures ANOVA followed by Tukey's test. \*\**P* < 0.01.

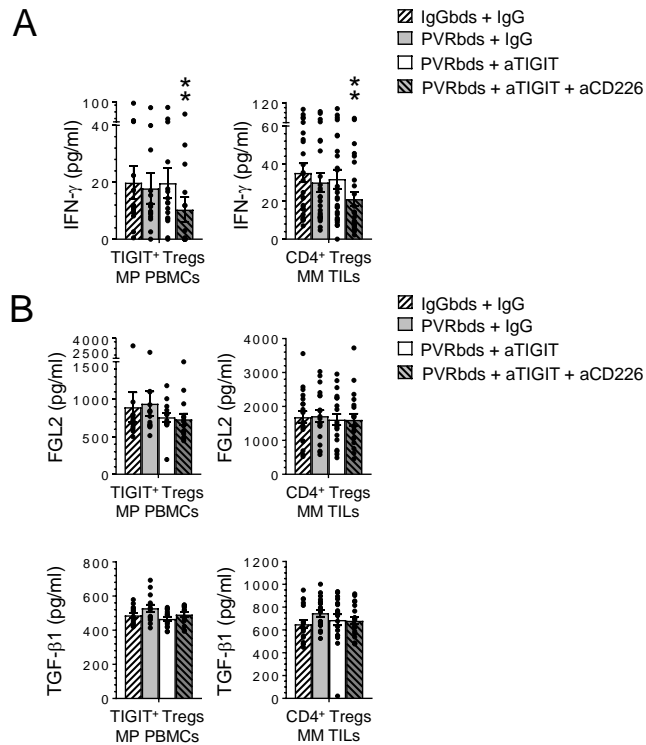

**Supplemental Figure 6. Cytokine production by TIGIT<sup>+</sup> Tregs from melanoma patients upon TIGIT and/or CD226 blockade and PVR binding. (A-B)** Summary data showing the production of IFN- $\gamma$  (**A**) and FGL2 and TGF- $\beta$ 1 (**B**) by TIGIT<sup>+</sup> CD25<sup>hi</sup> CD127<sup>-</sup> CD4<sup>+</sup> Tregs isolated from PBMCs of melanoma patients (MPs) ( $n = 15$  for IFN- $\gamma$ ,  $n = 14$  for FGL2 and TGF- $\beta$ 1) and total CD25<sup>hi</sup> CD127<sup>-</sup> CD4<sup>+</sup> Tregs isolated from metastatic melanoma (MM) tumor-infiltrating lymphocytes (TILs) ( $n = 27$  for IFN- $\gamma$ ,  $n = 20$  for FGL2,  $n = 19$  for TGF- $\beta$ 1) after a 6-day IVS with aCD3/CD28/IgG or aCD3/CD28/PVR beads in the presence of aTIGIT and/or aCD226 blocking mAbs and/or IgG control mAbs. Error bars indicate s.e.m. P values were obtained by repeated-measures ANOVA followed by Tukey's test. \*P < 0.05; \*\*P < 0.01; \*\*\*P < 0.001.
